# Supplementary material for: The role of NSP6 in the biogenesis of the SARS-CoV-2 replication organelle
Source: Springer Nature journal article supplement (doi:10.1038/s41586-022-04835-6), 2022-05-12
Supplement: 41586_2022_4835_MOESM22_ESM.xlsx [file 41586_2022_4835_MOESM22_ESM.xlsx]

## Sheet: Extended Data Fig 1b
Fluoescence intensity (AU)
				NSP6-FLAG	FLAG-NSP6
				5913304	7679651				Table Analyzed	Data 1
				5022177	5319973
				6347757	5715545				Column D	NSP6-FLAG
				6876740	7620927				vs.	vs,
				8441717	7741304				Column C	FLAG-NSP6
				4875668	6647965
				6093519	8390232				Unpaired t test with Welch's correction
				5392114	5521237				P value	0.8326
				6707722	6110106				P value summary	ns
				7009654	5535478				Significantly different? (P < 0.05)	No
				4218381	8446284				One- or two-tailed P value?	Two-tailed
				6201746	5310815				Welch-corrected t, df	t=0,2117 df=135,8
				5672202	4446123
				4882519	6826504				How big is the difference?
				5356053	6242460				Mean ± SEM of column C	6,244e+006 ± 145486, n=69
				8065122	7878948				Mean ± SEM of column D	6,286e+006 ± 139872, n=69
				7750911	8171493				Difference between means	42731 ± 201818
				5770606	5559021				95% confidence interval	-356381 to 441844
				7261177	4588299				R squared	0.00033
				6708541	5154722
				7996920	4106492				F test to compare variances
				8194931	6963338				F,DFn, Dfd	1,082, 68, 68
				7898605	6440688				P value	0.7465
				6835271	6408313				P value summary	ns
				8053017	6904486				Significantly different? (P < 0.05)	No
				6748458	4076506
				5608225	6997116
				7791757	4704022
				8016137	7908684
				4971659	5331405
				4723238	5555958
				5825882	6296703
				7122619	4057286
				6702332	7948174
				4889213	7992348
				5811071	6428836
				7066965	5331405
				5171448	6692332
				6556096	4879213
				7115606	7415936
				7016384	6503851
				6259291	5216359
				4591755	6378179
				6999754	6370419
				6706956	7411138
				4487493	6018209
				4960079	6338666
				6895836	4973421
				5629128	6116823
				5098163	7230411
				6167719	5171994
				5131596	4157413
				7345157	7368839
				7714670	4105651
				4427231	6657840
				6942631	7663311
				4013348	7799841
				4174330	6597612
				6325516	4113622
				6378767	6738923
				6751144	6214943
				6687441	6294222
				4847353	5296163
				5802025	6070340
				6937801	6412540
				5189196	7815772
				7902325	7216046
				7691260	4485555
				7016453	6725002
